# Supplementary material
Source: publisher figshare collection journal article supplement (https://sage.figshare.com/ndownloader/files/23950049)

**Supplemental Figure 1.** Due to faint color of stained specimens, we prepared brightness reduced images of Figure 4 by Adobe Photoshop® CS6 with the same settings. Scale bar = 5mm.

**A**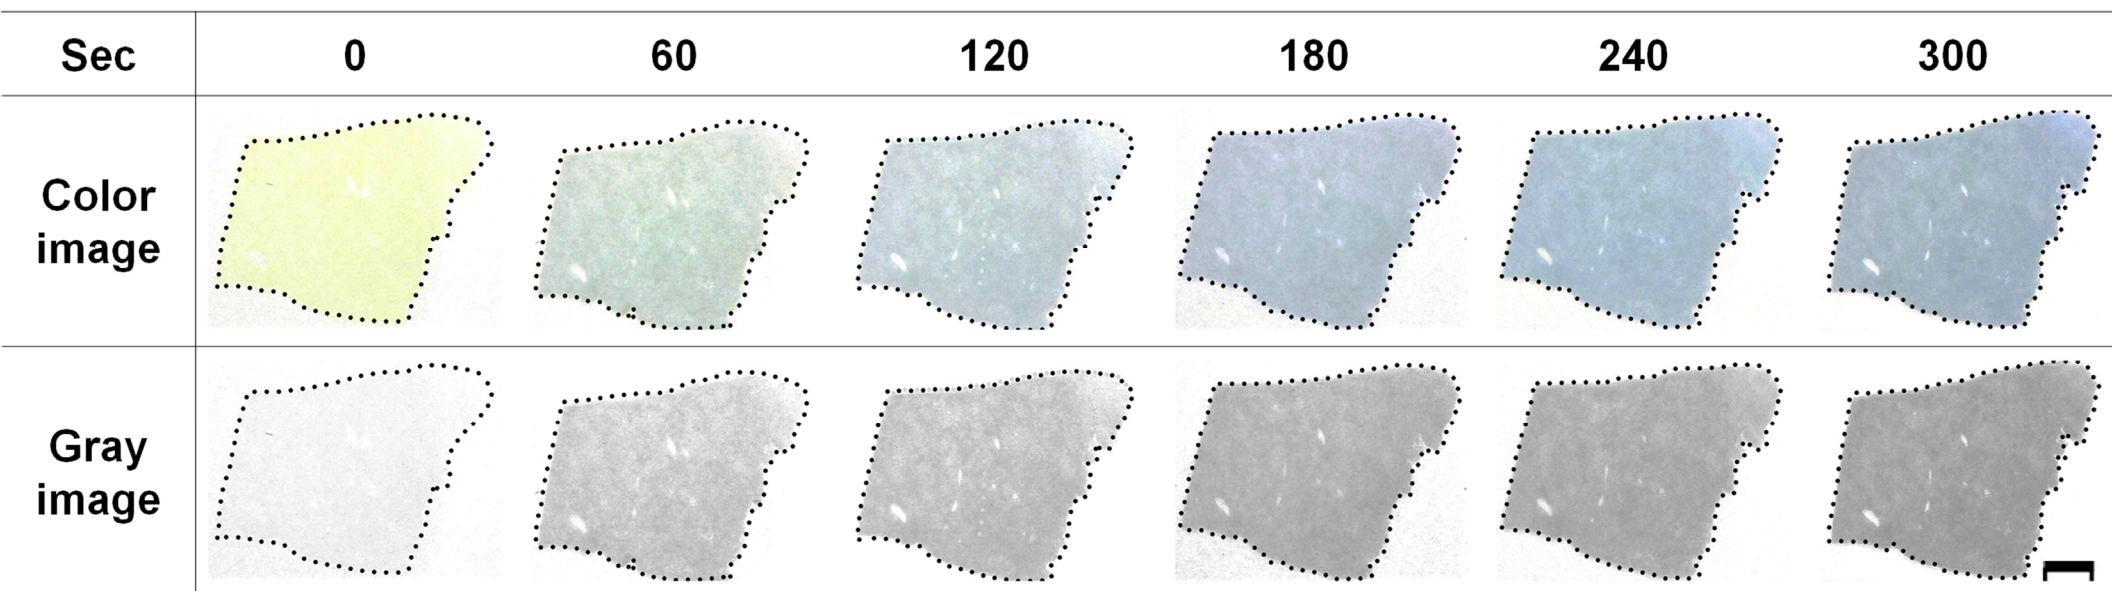**B**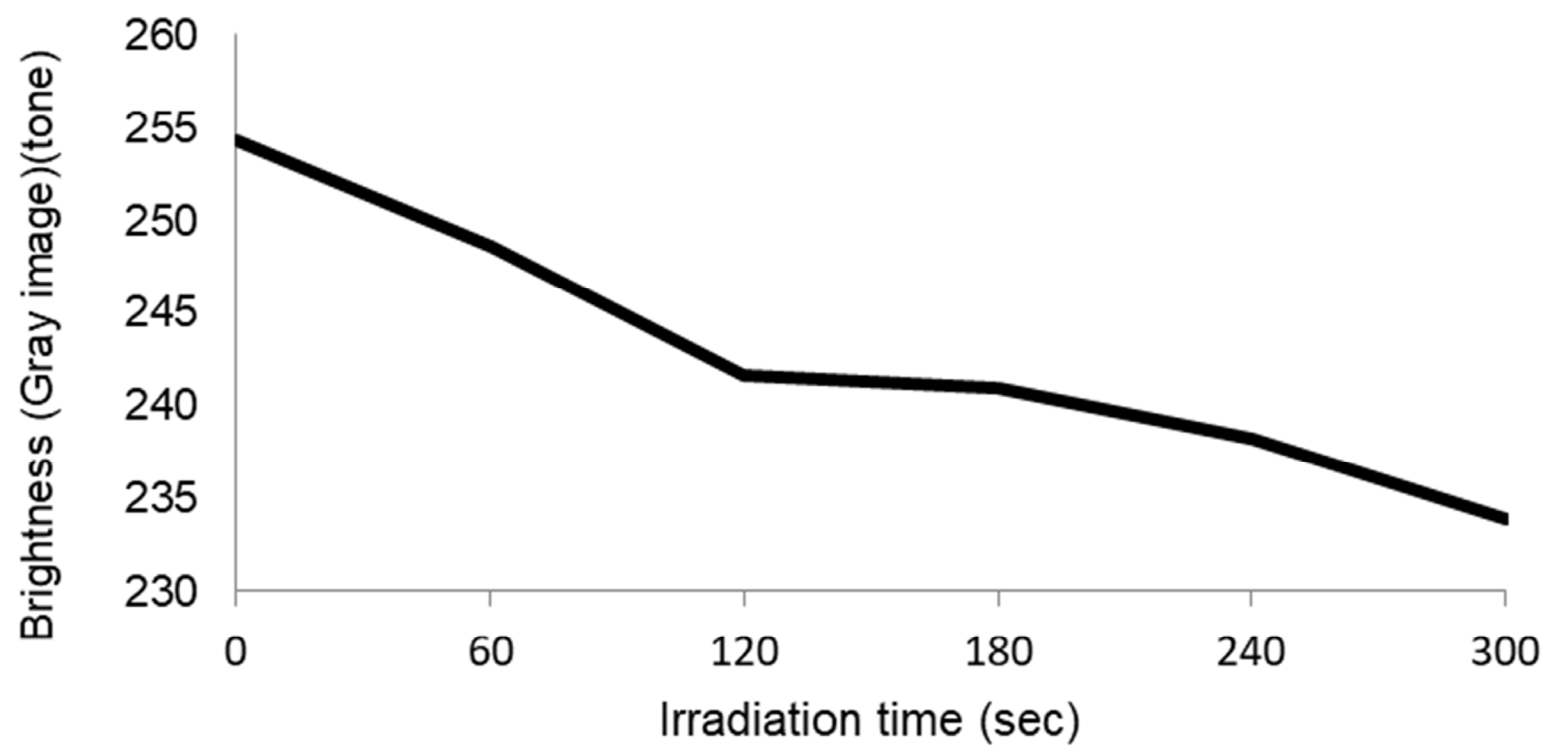

**Supplemental Figure 2.** Due to faint color of stained specimens, we prepared brightness reduced images of Figure 5 by Adobe Photoshop® CS6 with the same settings. Scale bar = 5mm.

**A**

|             | Sunlight                                                                          |                                                                                   |                                                                                   |                                                                                    | VSS (thrice)                                                                        |                                                                                     |                                                                                     |                                                                                     |
|-------------|-----------------------------------------------------------------------------------|-----------------------------------------------------------------------------------|-----------------------------------------------------------------------------------|------------------------------------------------------------------------------------|-------------------------------------------------------------------------------------|-------------------------------------------------------------------------------------|-------------------------------------------------------------------------------------|-------------------------------------------------------------------------------------|
|             | UV cut film+                                                                      |                                                                                   | UV cut film-                                                                      |                                                                                    | UV cut film+                                                                        |                                                                                     | UV cut film-                                                                        |                                                                                     |
|             | Before                                                                            | After                                                                             | Before                                                                            | After                                                                              | Before                                                                              | After                                                                               | Before                                                                              | After                                                                               |
| Color Image | 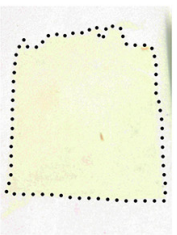 |  |  |  |  |  |  |  |
| Gray Image  |  |  |  |  |  |  |  |  |

**B**

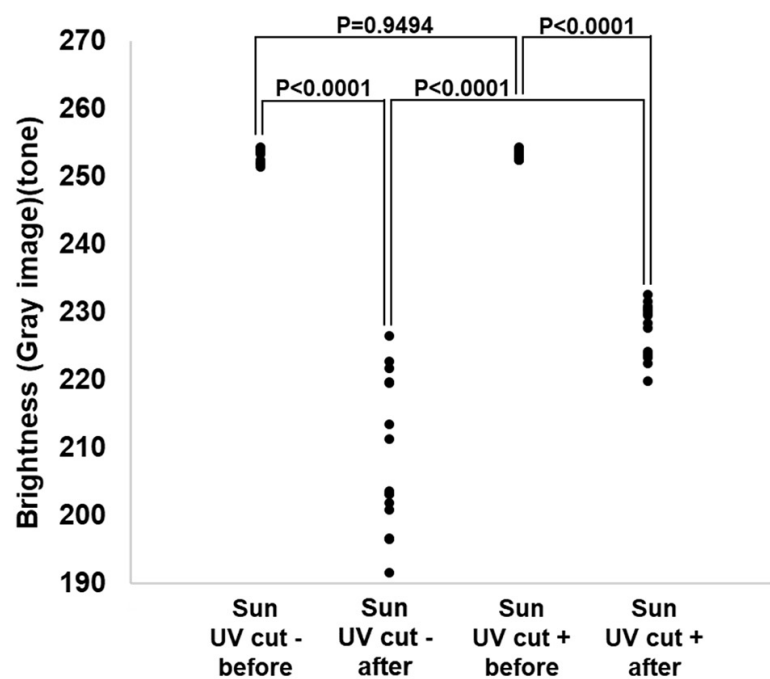

**C**

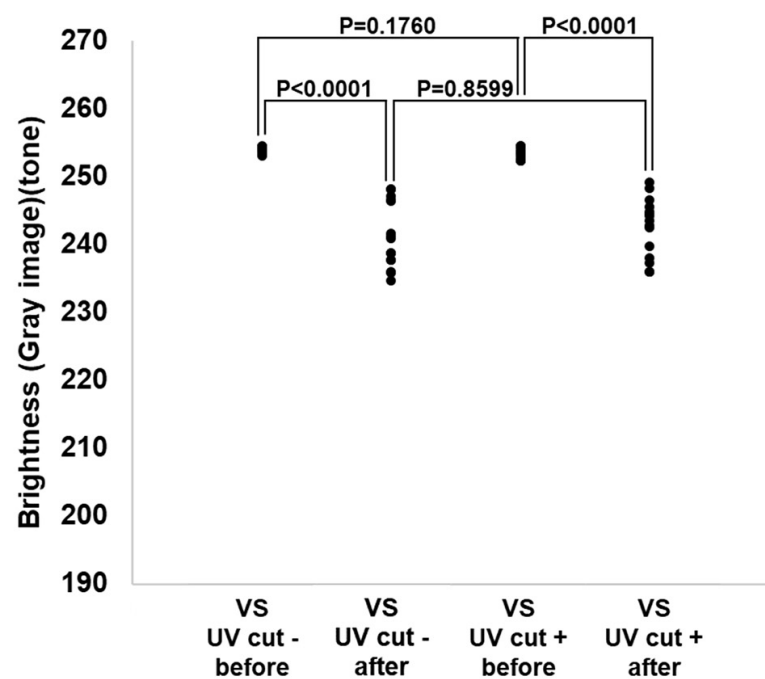

**Supplemental Figure 3.** The schematic diagram of the tape-type light-emitting diode (LED) strip and exposure procedure using tape-type LED strips and a dark box. Tape-type LED strips consisted of linearly aligned LED modules containing red, green, and blue LED chips. Each color component was independently flashed to create a single LED color, or all LEDs were flashed to create white light (A). (B) The tape-type LED strip was placed inside the box, and then samples placed in Eppendorf tubes were placed inside the box. The lid was closed, and the LED light was activated.

**A**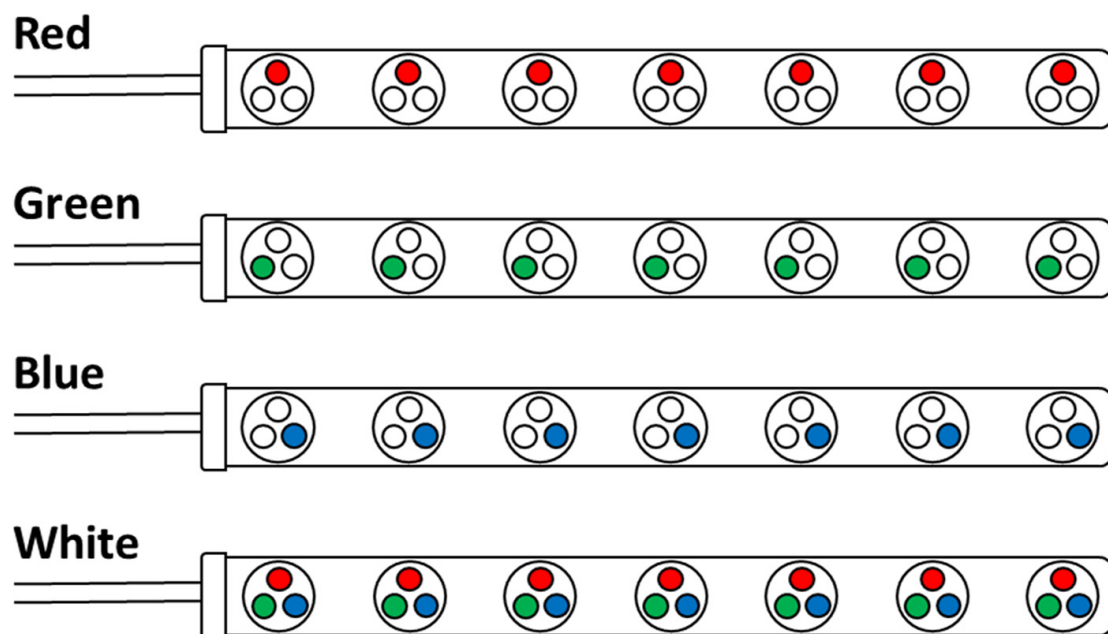**B**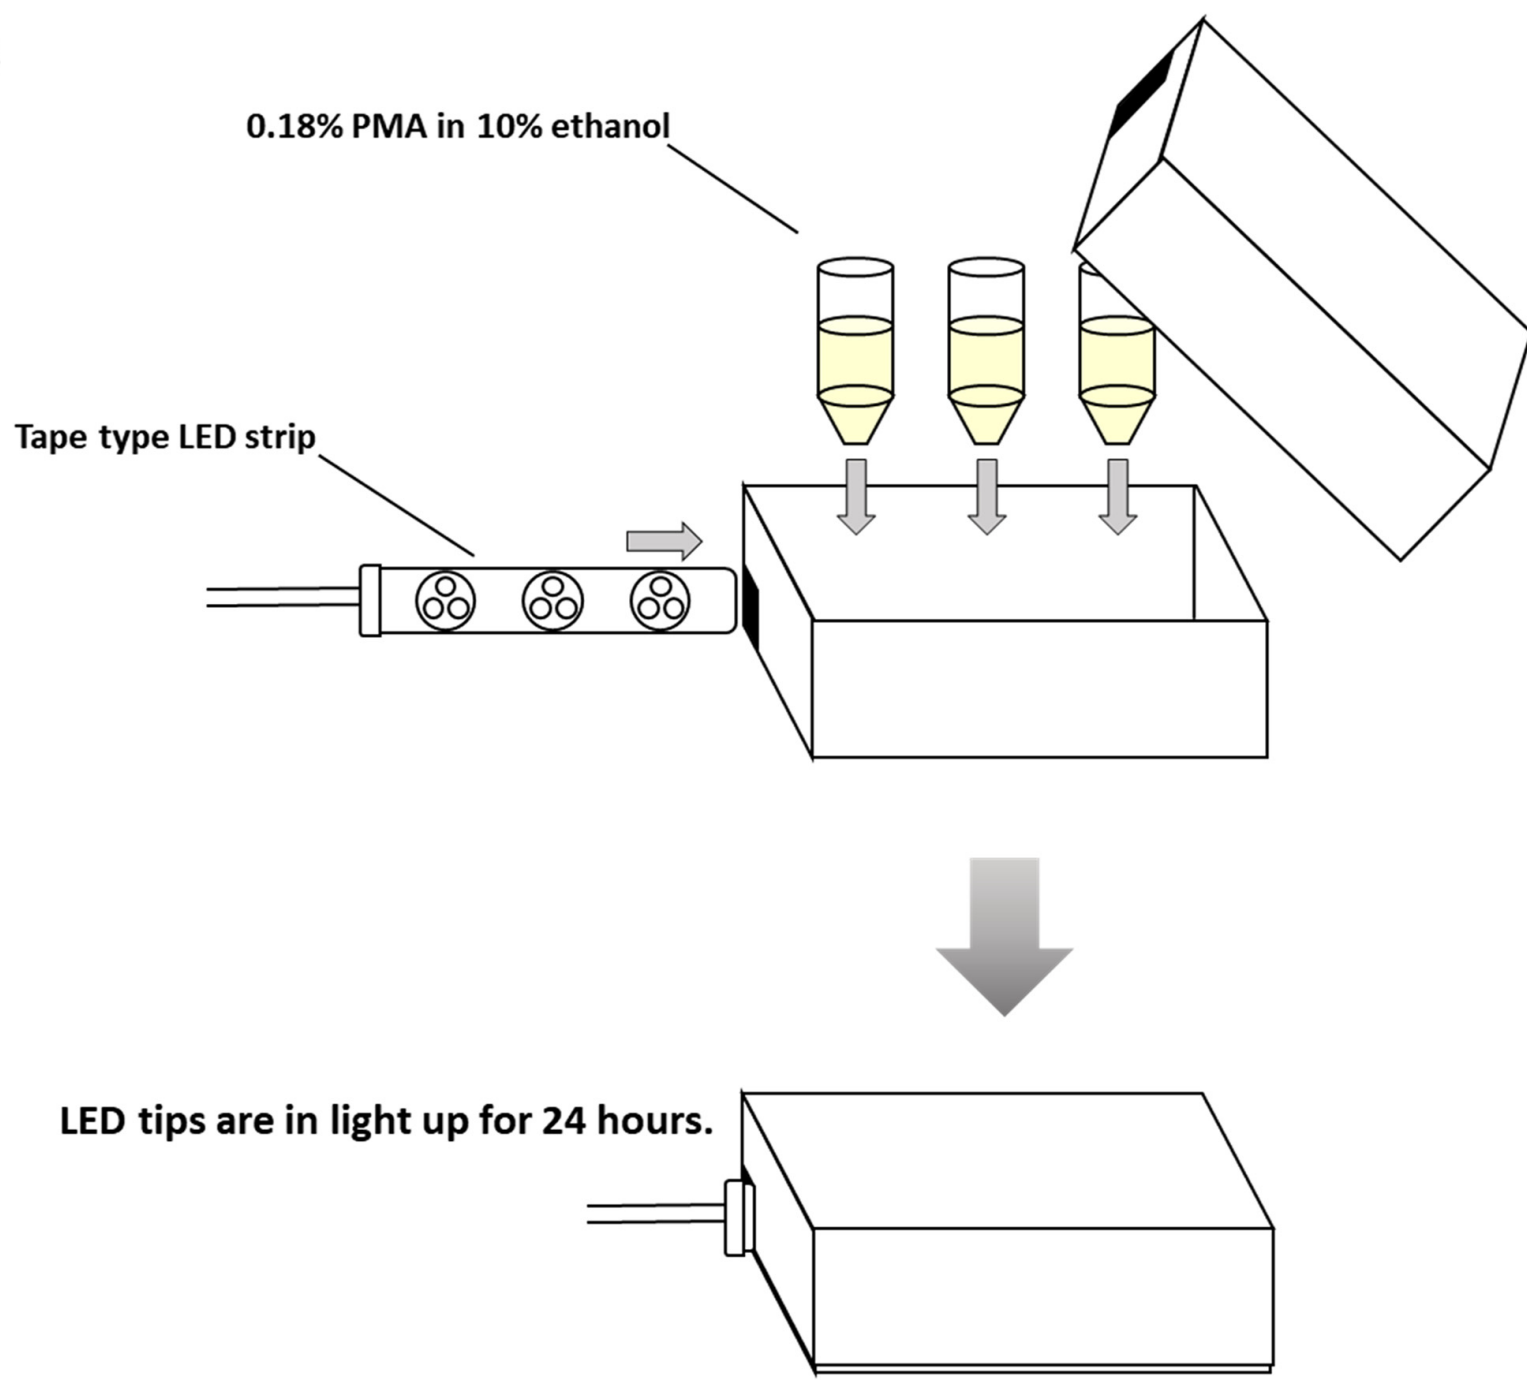

Supplement: Supplementary file 1 [file 23950049]
